# Supplementary material for: A new copper nanocluster surface molecular imprinted polymethacrylic acid probe for ultratrace trichlorophenol based on in situ-generated nanogold SPR effects
Source: Royal Society of Chemistry journal article supplement (doi:10.1039/d3an02093b), 2024-01-01
Supplement: d3an02093b1.pdf [file d3an02093b1.pdf]

# A new difunctional copper nanocluster surface molecular imprinting polymethacrylic acid probe for ultratrace trichlorophenol based-in situ generated nanogold SPR effects

Li Lin<sup>a,b</sup>, Aihui Liang<sup>a,b</sup>, Guiqing Wen<sup>a,b,\*</sup>, Zhiliang Jiang<sup>a,b,\*</sup>

<sup>a</sup>Key Laboratory of Ecology of Rare and Endangered Species and Environmental Protection (Guangxi Normal University), Ministry of Education, Guilin 541004, China.

<sup>b</sup>Guangxi Key Laboratory of Environmental Pollution Control Theory and Technology, Guilin 541004, China.

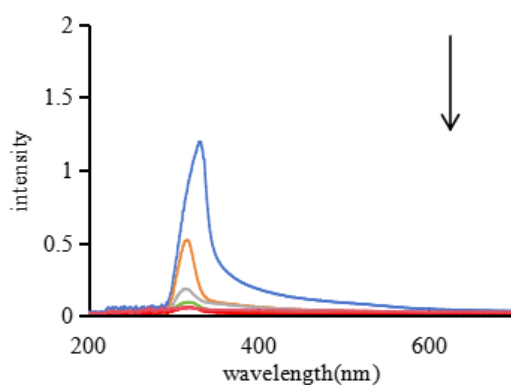

Fig.S1 UV spectra of the supernatant after CuNC@MIP elution

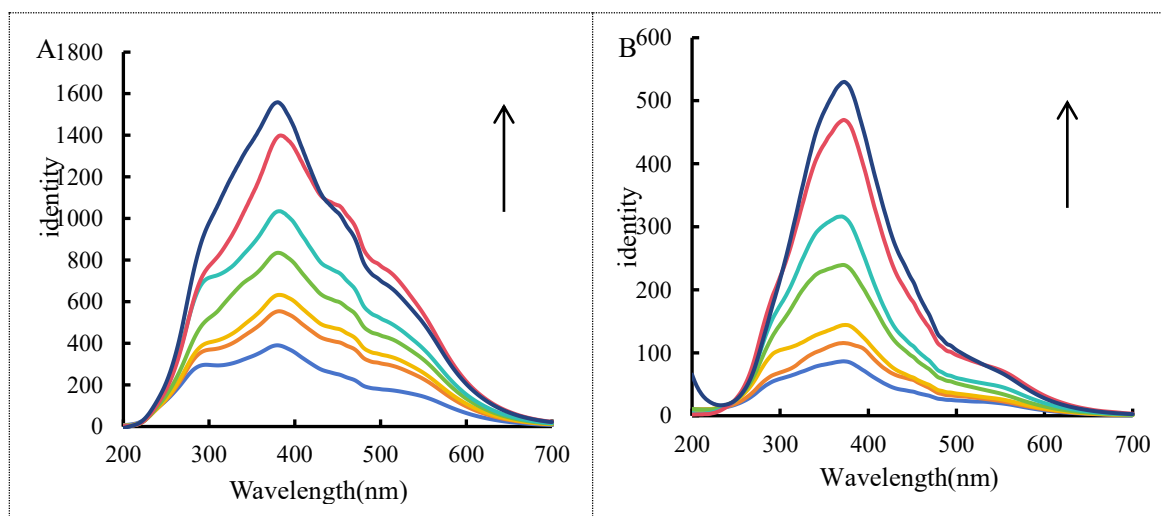

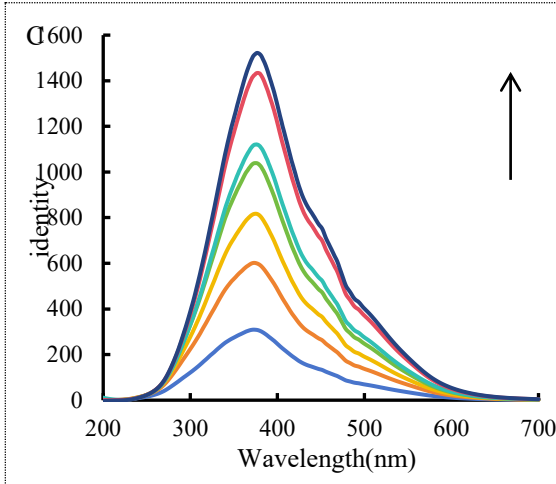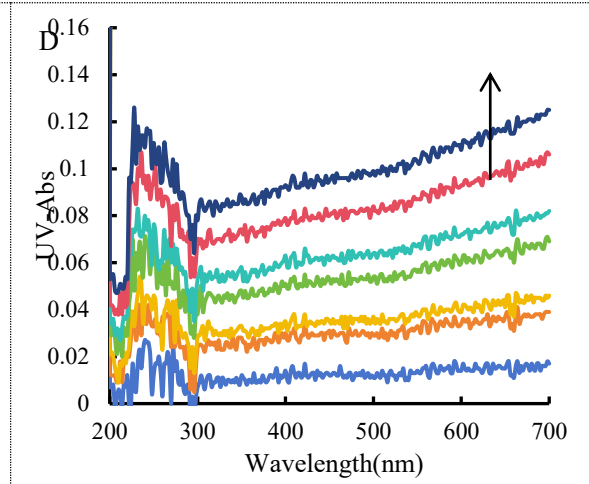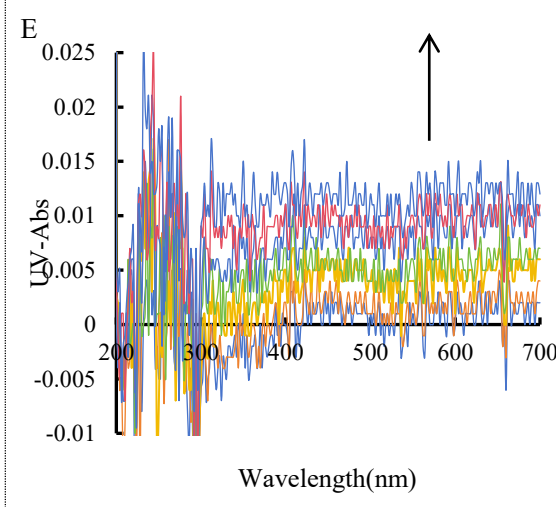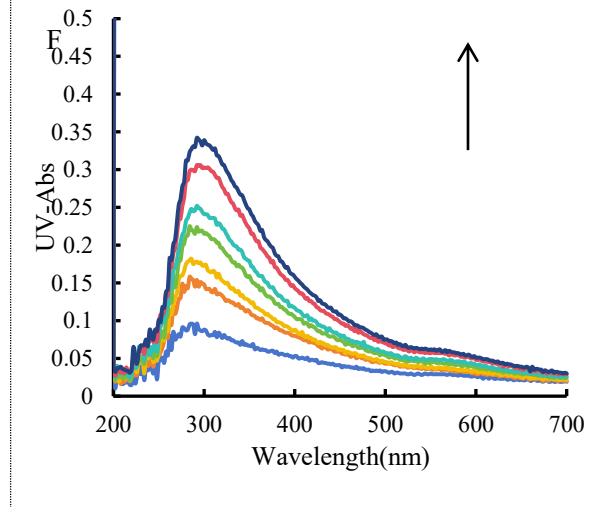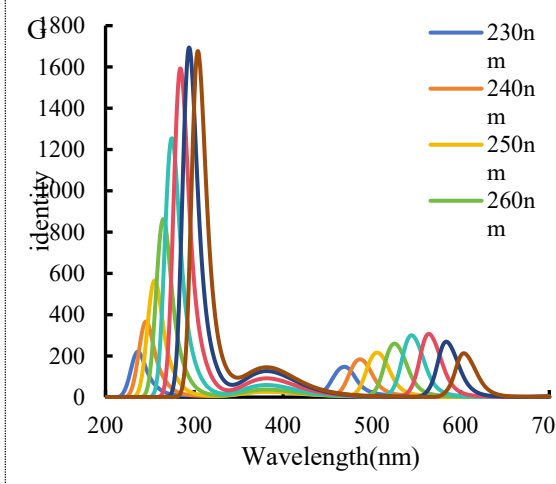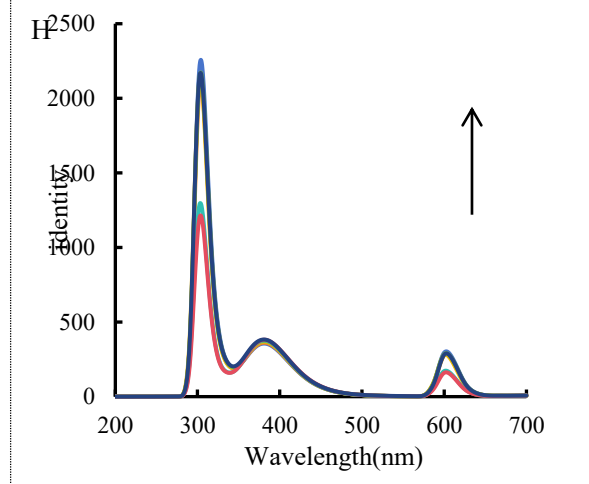

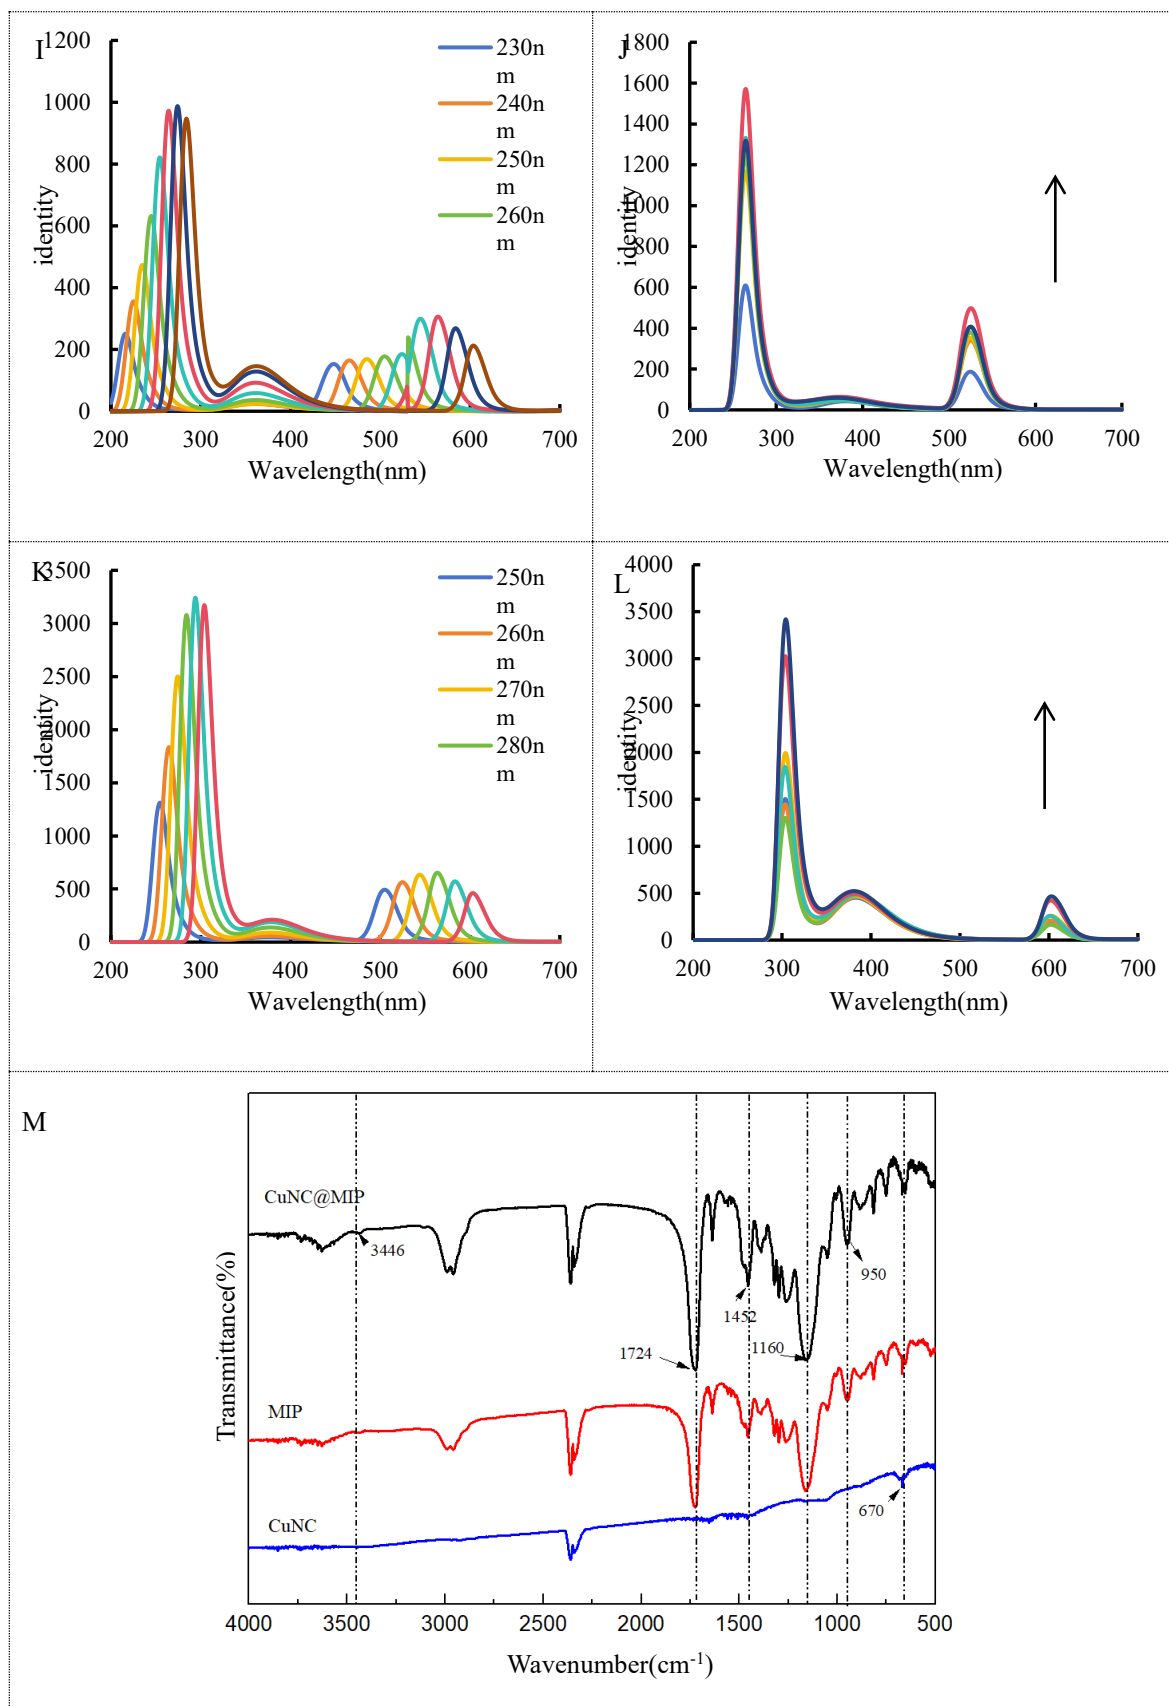

Fig. S2 Spectra of CuNC@MIP/MIP/CuNC

A: RRS spectra of (0.001,0.0025,0.0035,0.005,0.006,0.0075,0.01) g/L CuNC@MIP, B: RRS spectra of (0.001,0.0025,0.0035,0.005,0.006,0.0075,0.01) g/L MIP, C: RRS spectra of (0.0333,0.08325,0.11655,0.1665,0.1998,0.24975,0.333) mmol/L CuNC, D: Abs spectra of

(0.01,0.025,0.035,0.05,0.06,0.075,0.1) g/L CuNC@MIP, E: Abs spectra of (0.01,0.025,0.035,0.05,0.06,0.075,0.1) g/L MIP, F: Abs spectra of (0.0333,0.08325,0.11655,0.1665,0.1998,0.24975,0.333) mmol/L CuNC, G: fluorescence emission spectra of 0.025 g/L CuNC@MIP at different excitation wavelengths, H: fluorescence spectra of (0.025,0.05,0.075,0.1,0.125,0.15,0.175) g/L CuNC@MIP, I: fluorescence emission spectra of 0.01 g/L MIP at different excitation wavelengths, J: fluorescence spectra of (0.025,0.05,0.075,0.1,0.125,0.15,0.175) g/L MIP, K: fluorescence emission spectra of 0.0333 mmol/L CuNC at different excitation wavelengths, L: fluorescence spectra of (0.0333,0.08325,0.11655,0.1665,0.1998,0.24975,0.333) mmol/L CuNC, M: Infrared spectra of CuNC@MIP/MIP/CuNC.

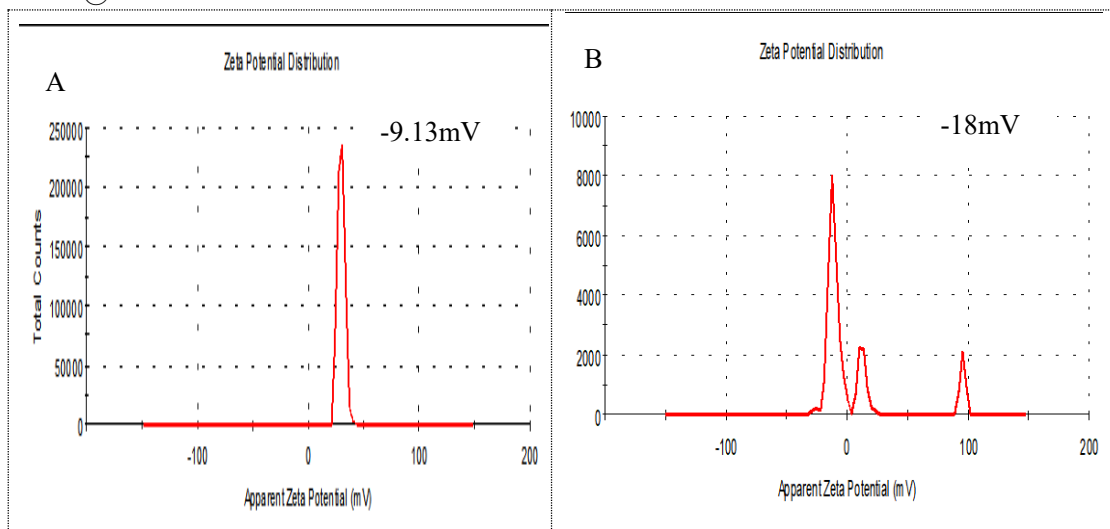

Fig. S3 Zeta potentials of CuNC@MIP and MIP

A: the Zeta potential of the CuNC@MIP, B: the Zeta potential of the MIP.

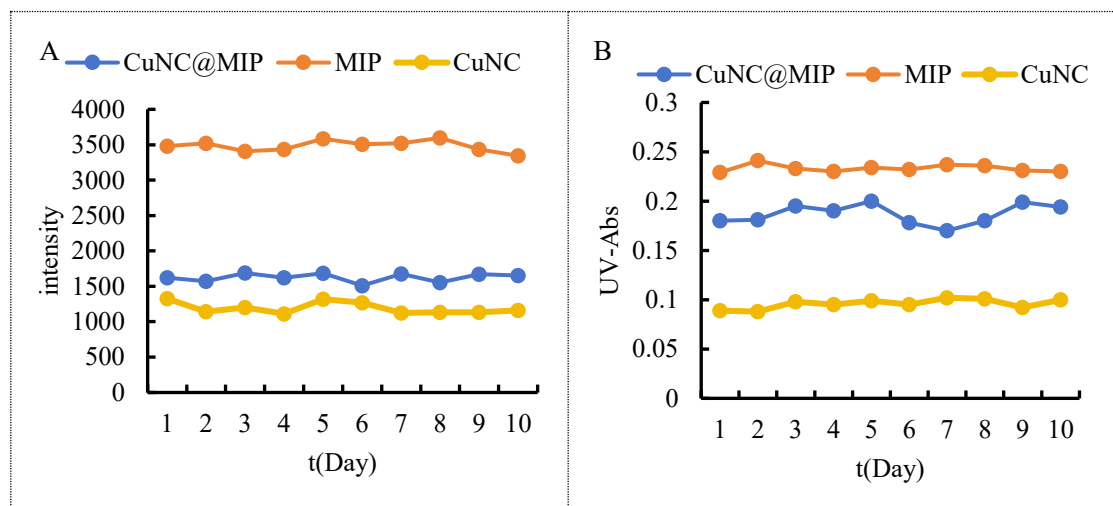

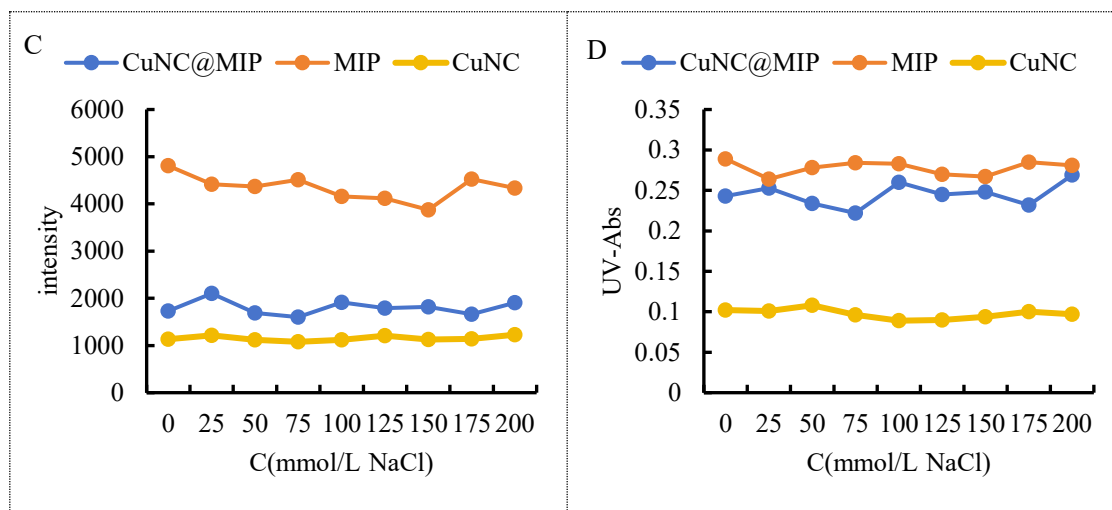

Fig. S4 Stability of CuNC@MIP, MIP, and CuNC at different times and in the NaCl solution  
 A: RRS spectra of time stability of 0.1 g/L CuNC@MIP, 0.1 g/L MIP and 0.25 g/L CuNC, B: Abs spectra of time stability of 0.1 g/L CuNC@MIP, 0.1 g/L MIP and 0.25 g/L CuNC, C: RRS spectra of the stability of 0.1 g/L CuNC@MIP, 0.1 g/L MIP and 0.25 g/L CuNC in different concentrations of NaCl solutions; D: Abs spectra of the stability of 0.1 g/L CuNC@MIP, 0.1 g/L MIP and 0.25 g/L CuNC in different concentrations of NaCl solutions.

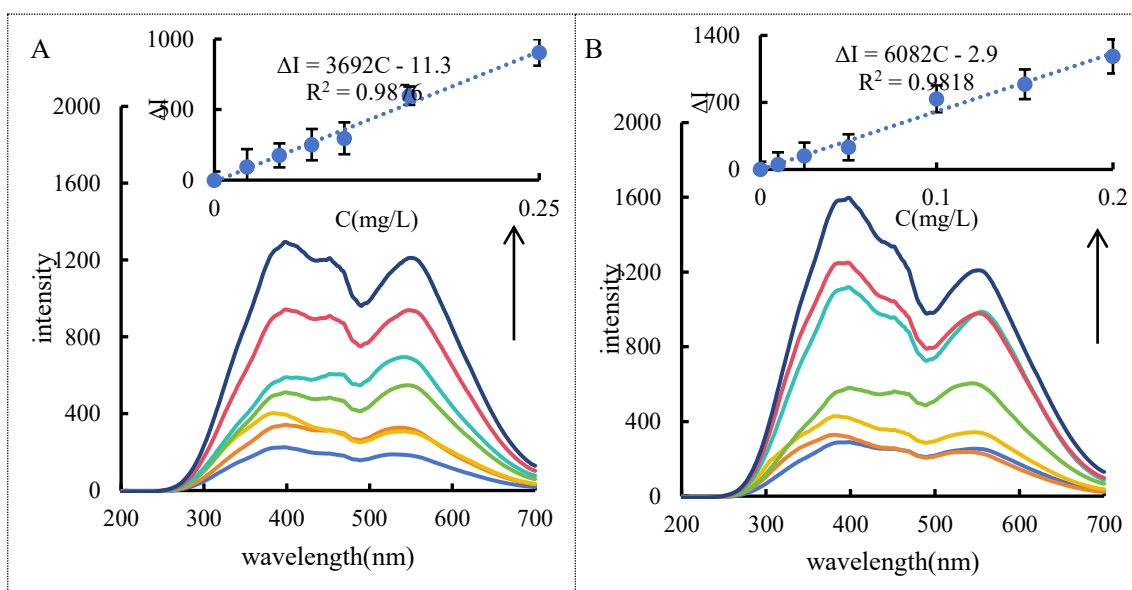

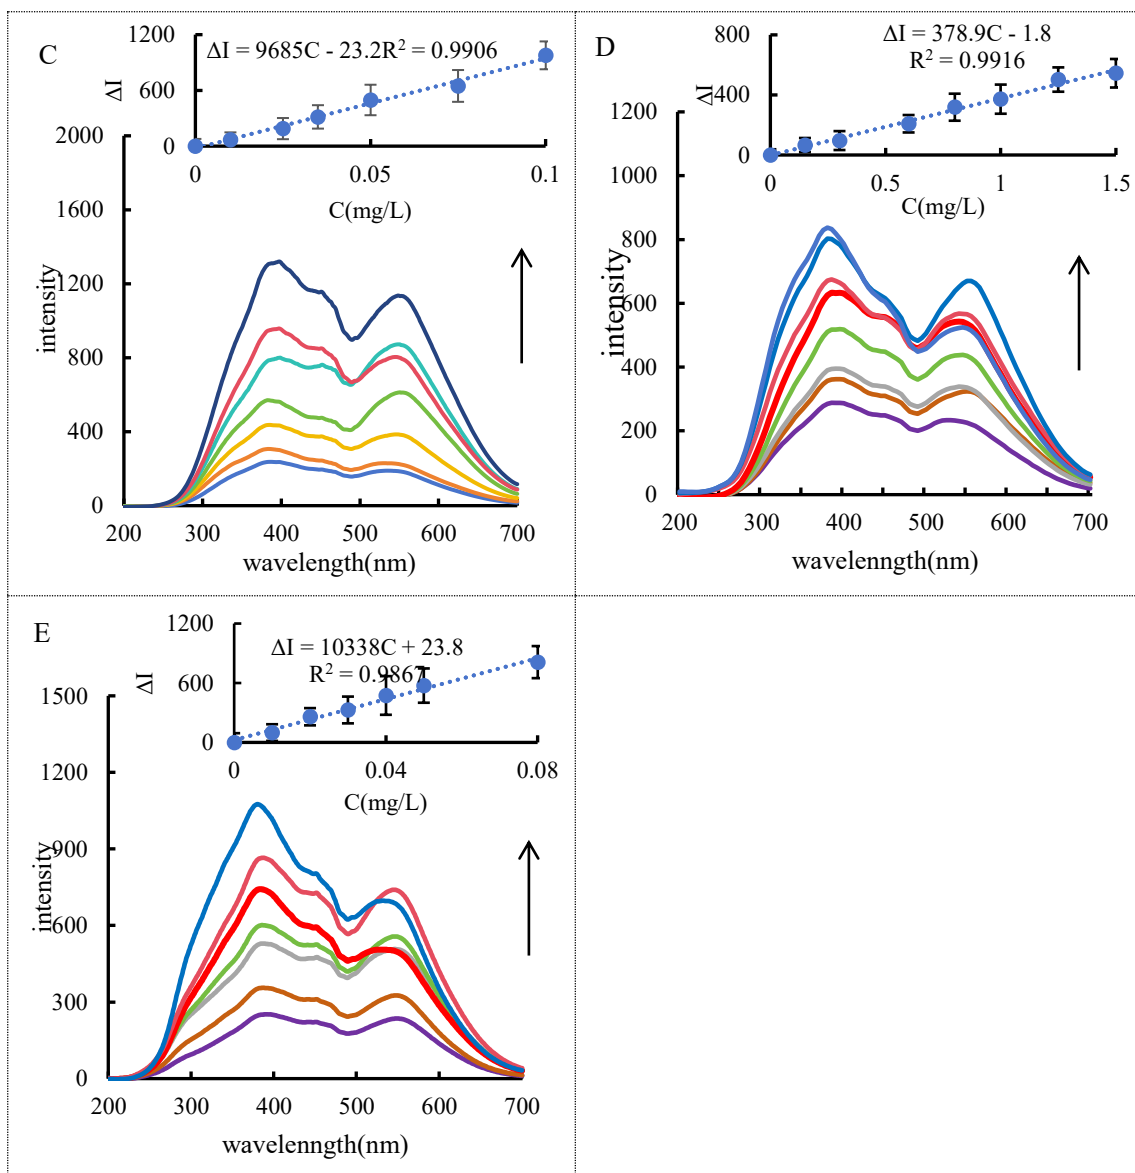

Fig. S5 RRS spectra of the AuNC@MIP/AgNC@MIP/CuNC/MIP/MIP/CuNC@MIP<sub>TCP</sub>-HAuCl<sub>4</sub>-hydrazine hydrate-HCl catalytic system (n=3)

A: (0,0.025,0.05,0.075,0.1,0.15,0.25) mg/L AuNC@MIP-0.04 g/L HAuCl<sub>4</sub>- 0.10 mmol/L hydrazine hydrate-1.85 mmol/L HCl, B: (0,0.01,0.025,0.05,0.1,0.15,0.2) mg/L AgNC@MIP-0.04 g/L HAuCl<sub>4</sub>-0.10 mmol/L hydrazine hydrate-1.85 mmol/L HCl, C: (0,0.01,0.025,0.035,0.05,0.075,0.1) mg/L CuNC@MIP- 0.04 g/L HAuCl<sub>4</sub>-0.10 mmol/L hydrazine hydrate-1.85 mmol/L HCl, D: (0,0.15,0.3,0.6,0.8,1,1.25,1.5,1.75) mg/L MIP-0.04 g/L HAuCl<sub>4</sub>-0.10 mmol/L hydrazine hydrate-1.85 mmol/L HCl, E: (0,0.01,0.02,0.03,0.04,0.05,0.08) mg/L CuNC@MIP<sub>TCP</sub>-0.04 g/L HAuCl<sub>4</sub>-0.10 mmol/L hydrazine hydrate-1.85 mmol/L HCl.

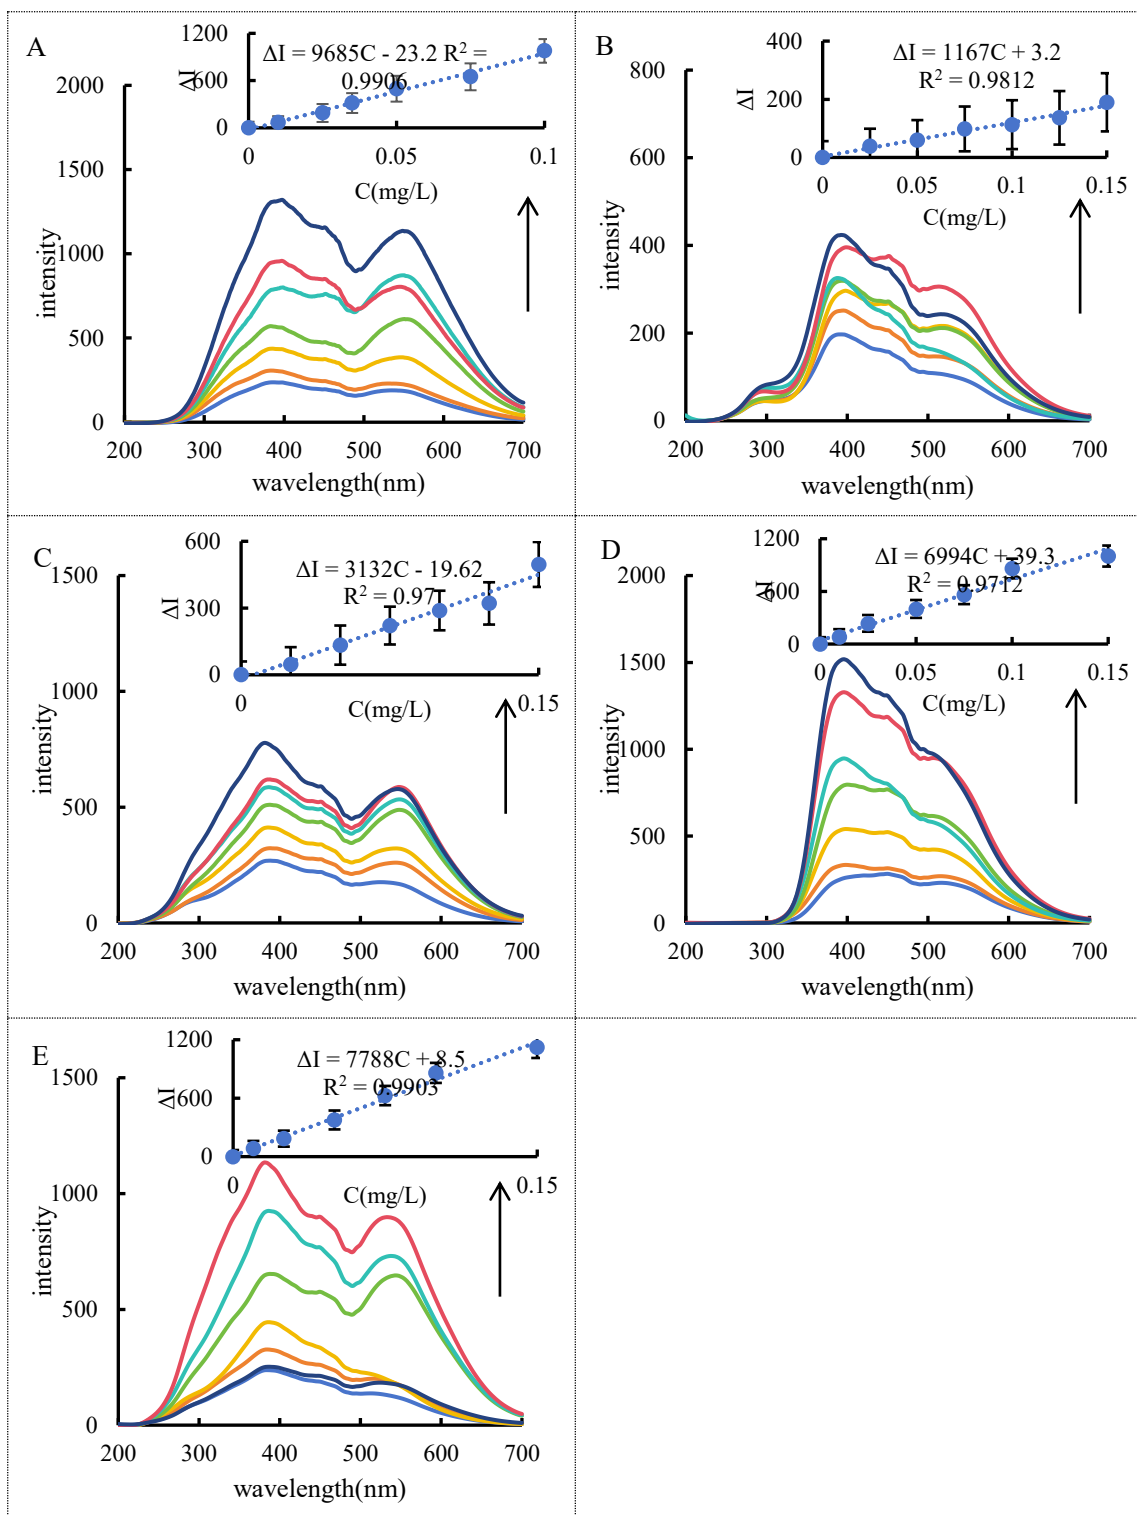

Fig. S6 RRS spectra of the CuNC@MIP-HAuCl<sub>4</sub>-HCl-hydrazine hydrate/diphenylcarbazine/hydroxylamine hydrochloride/sym-diphenylcarbazine/hydrazine sulfate catalytic system (n=3)  
 A: (0,0.01,0.025,0.035,0.05,0.075,0.1) mg/L CuNC@MIP-0.04 g/L HAuCl<sub>4</sub>-0.10 mmol/L hydrazine hydrate-1.85 mmol/L HCl, B: (0,0.025,0.05,0.075,0.1,0.125,0.15) mg/L CuNC@MIP-0.04 g/L HAuCl<sub>4</sub>-0.1 mmol/L diphenylcarbazine-1.85 mmol/L HCl, C: (0,0.025,0.05,0.075,0.1,0.125,0.15) mg/L CuNC@MIP-0.04 g/L HAuCl<sub>4</sub>-7.5 mol/L hydroxylamine hydrochloride -1.85 mmol/L HCl, D: 0,0.01,0.025,0.05,0.075,0.1,0.15) mg/L CuNC@MIP-0.04 g/L HAuCl<sub>4</sub>-10 mmol/L sym-diphenylcarbazine-1.85 mmol/L HCl, E:

(0,0.01,0.025,0.05,0.075,0.1,0.15) mg/L CuNC@MIP-0.04 g/L HAuCl<sub>4</sub>-0.1 mmol/L hydrazine sulfate-1.85 mmol/L HCl.

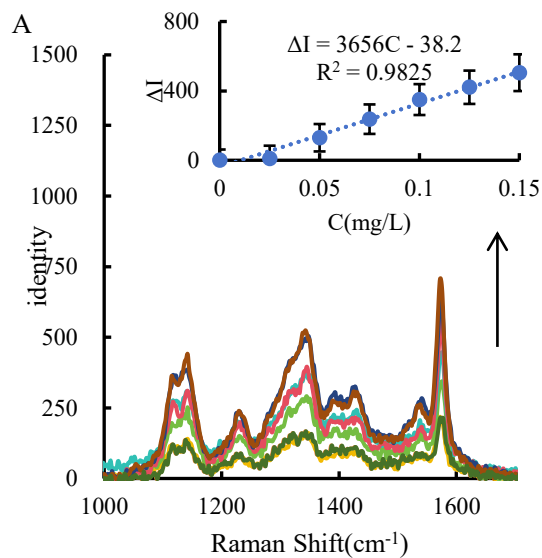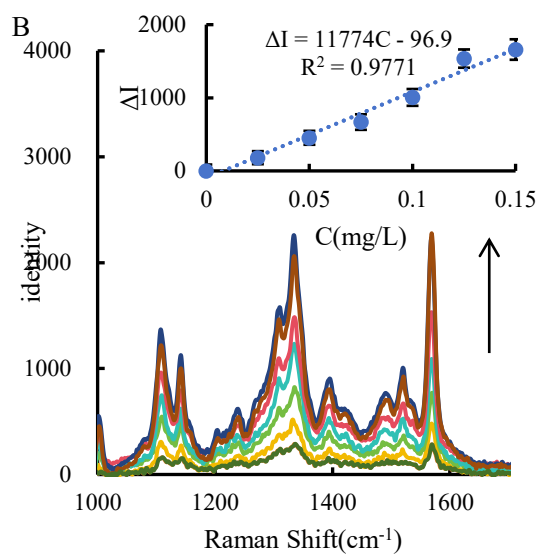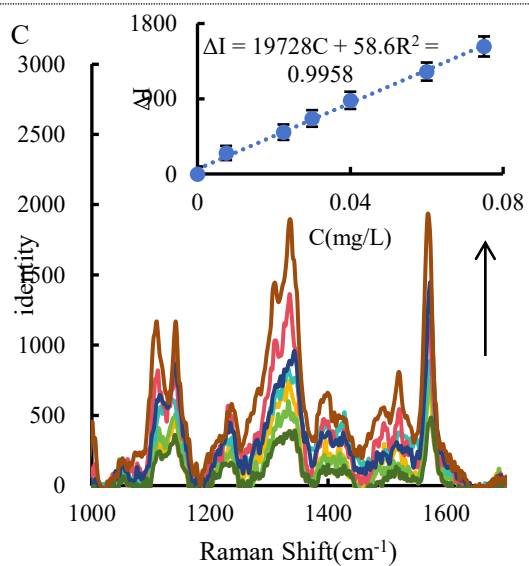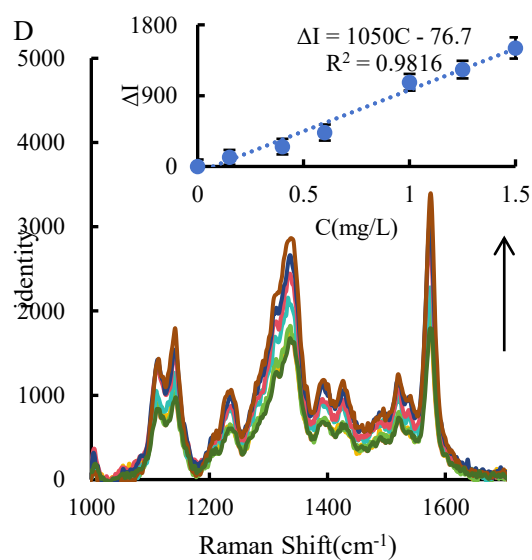



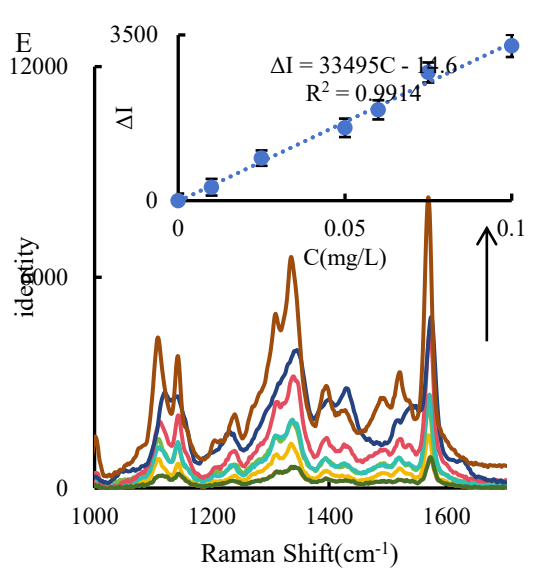

Fig. S7 SERS spectra of AuNC@MIP/AgNC@MIP/CuNC@MIP/MIP/CuNC@MIP<sub>TCP</sub>

-HAuCl<sub>4</sub>-hydrazine hydrate-HCl catalyzed system (n=3)

A: (0,0.025,0.05,0.075,0.1,0.125,0.15) mg/L AuNC@MIP-0.04 g/L HAuCl<sub>4</sub>-0.10 mmol/L hydrazine hydrate-0.5 mmol/L HCl-0.50 μmol/L VB4r, B: (0,0.025,0.05,0.075,0.1,0.125,0.15) mg/L AgNC@MIP-0.04 g/L HAuCl<sub>4</sub>-0.10 mmol/L hydrazine hydrate-0.5 mmol/L HCl-0.50 μmol/L VB4r, C: (0,0.0075,0.0225,0.03,0.04,0.06,0.075) mg/L CuNC@MIP-0.04 g/L HAuCl<sub>4</sub>-0.10 mmol/L hydrazine hydrate-1.85 mmol/L HCl-0.50 μmol/L VB4r, D: (0,0.15,0.4,0.6,1,1.25,1.5) mg/L MIP-0.04 g/L HAuCl<sub>4</sub>-0.10 mmol/L hydrazine hydrate-1.85 mmol/L HCl-0.50 μmol/L VB4r, E: (0,0.01,0.025,0.05,0.06,0.075,0.1) mg/L CuNC@MIP<sub>TCP</sub>-0.04 g/L HAuCl<sub>4</sub>-0.10 mmol/L hydrazine hydrate-1.85 mmol/L HCl-0.50 μmol/L VB4r.

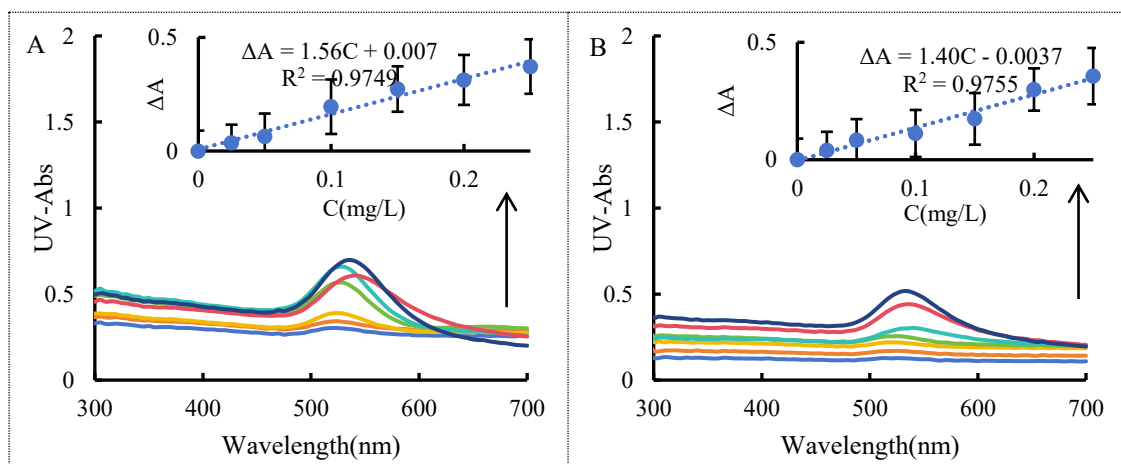

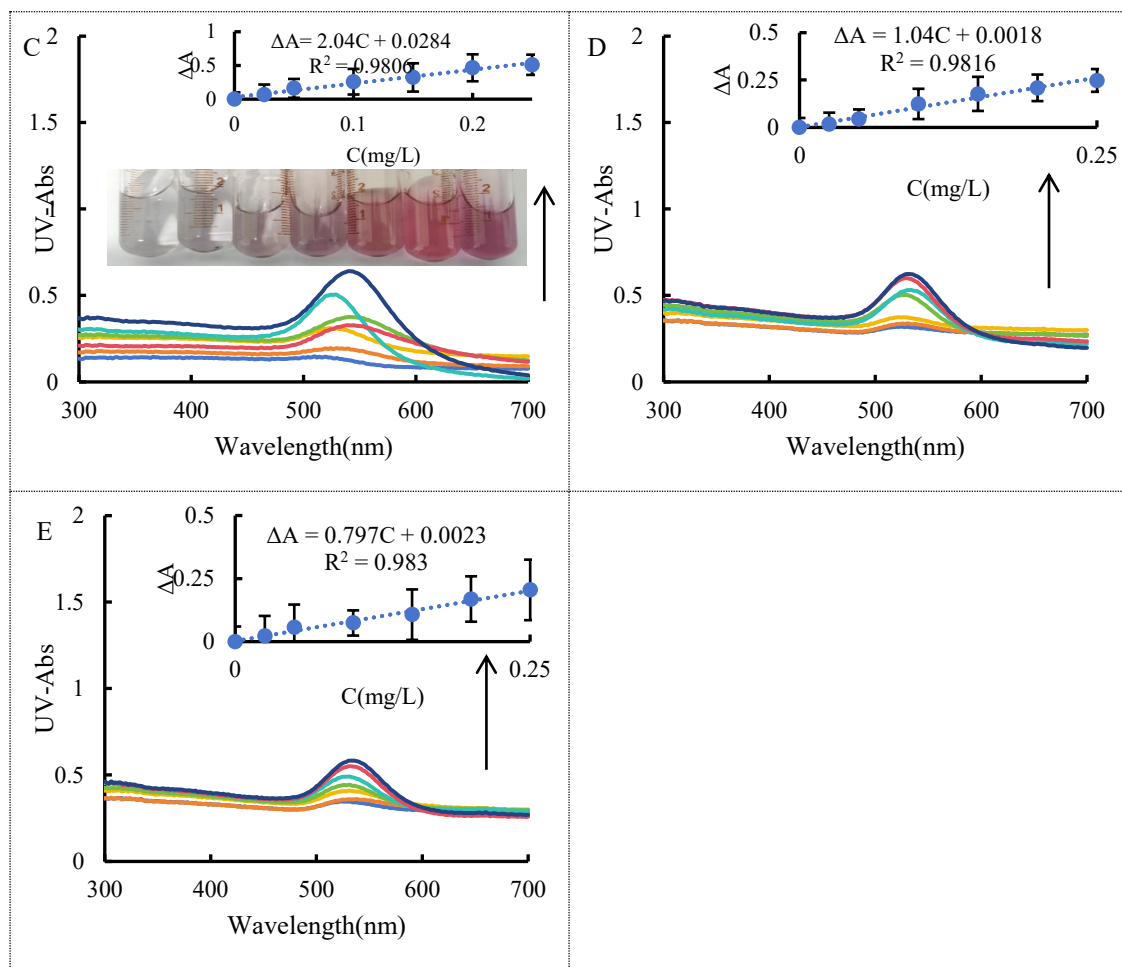

Fig. S8 UV spectra of AuNC@MIP/AgNC@MIP/CuNC@MIP/MIP/CuNC@MIP<sub>TCP</sub>-HAuCl<sub>4</sub>-hydrazine hydrate-HCl catalytic system (n=3)

A: (0,0.025,0.05,0.1,0.15,0.2,0.25) mg/L AuNC@MIP-0.075 g/L HAuCl<sub>4</sub>-0.45 mmol/L hydrazine hydrate-0.35 mmol/L HCl, B: (0,0.025,0.05,0.1,0.15,0.2,0.25) mg/L AgNC@MIP-0.075 g/L HAuCl<sub>4</sub>-0.45 mmol/L hydrazine hydrate-0.35 mmol/L HCl, C: (0,0.025,0.05,0.1,0.15,0.2,0.25) mg/L CuNC@MIP-0.075 g/L HAuCl<sub>4</sub>-0.45 mmol/L hydrazine hydrate-0.35 mmol/L HCl, D: (0,0.025,0.05,0.1,0.15,0.2,0.25) mg/L MIP-0.075 g/L HAuCl<sub>4</sub>-0.45 mmol/L hydrazine hydrate-0.35 mmol/L HCl, E: (0,0.025,0.05,0.1,0.15,0.2,0.25) mg/L CuNC@MIP<sub>TCP</sub>-0.075 g/L HAuCl<sub>4</sub>-0.45 mmol/L hydrazine hydrate-0.35 mmol/L HCl.

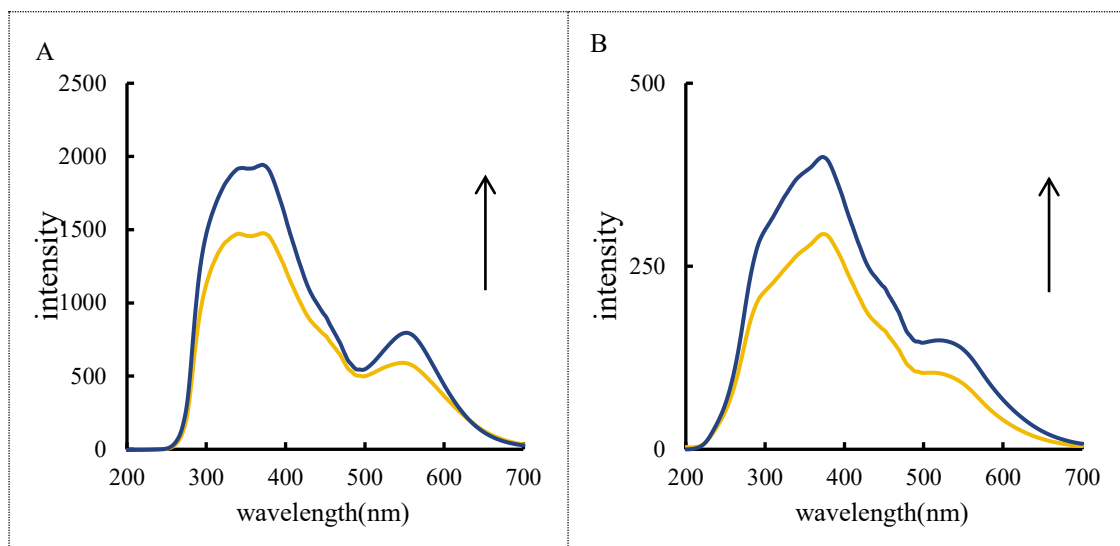

Fig.S9 RRS spectra of the tetraphenylborate/ $\text{Au}^+$  reaction systems

A: 0.04 mg/L CuNC@MIP- 0.04 g/L  $\text{HAuCl}_4$ -0.10 mmol/L hydrazine hydrate-1.85 mmol/L HCl-(0, 0.05) mmol/L sodium tetraphenylborate, B: (0, 0.08) mg/L CuNC@MIP- 0.04 g/L AuCl-0.10 mmol/L hydrazine hydrate.

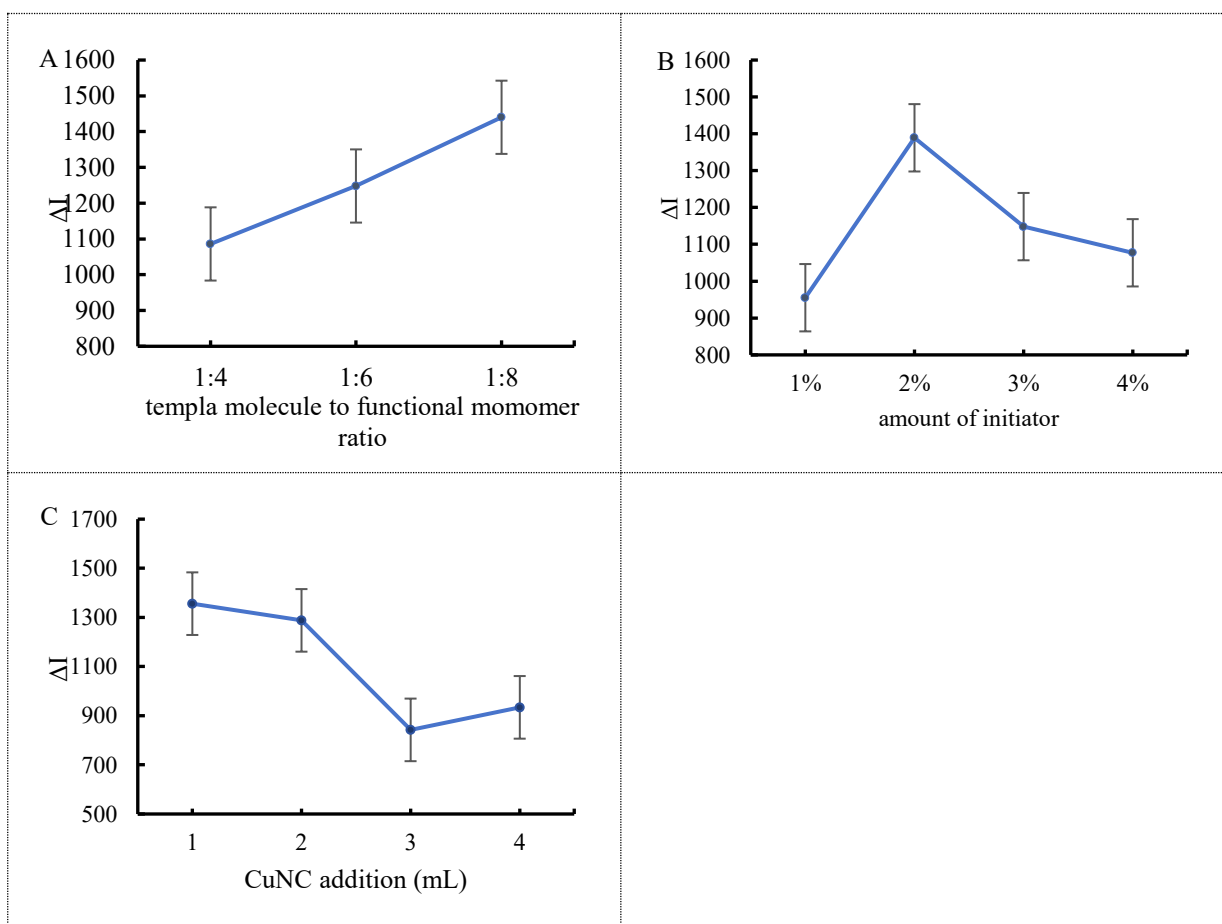

Fig. S10 Selection of the preparation conditions for the CuNC@MIP

A: effect of the amount of functional monomer used: 0.25 mmol TCP-(0.5, 0.085, 0.17) mL MAA-30 mL PVA-1.89 mL EGDMA-0.045 g AIBN-1 mL CuNC, B: effect of AIBN dosage: 0.25 mmol TCP-0.17 mL MAA-30 mL PVA-1.89 mL EGDMA-(0.022,0.045,0.065,0.087) g AIBN-1

mL CuNC, C: effect of the CuNC addition amount: 0.25 mmol TCP-0.17 mL MAA-30 mL PVA-1.89 mL EGDMA-0.045 g AIBN-(1,2,3,4) mL CuNC.

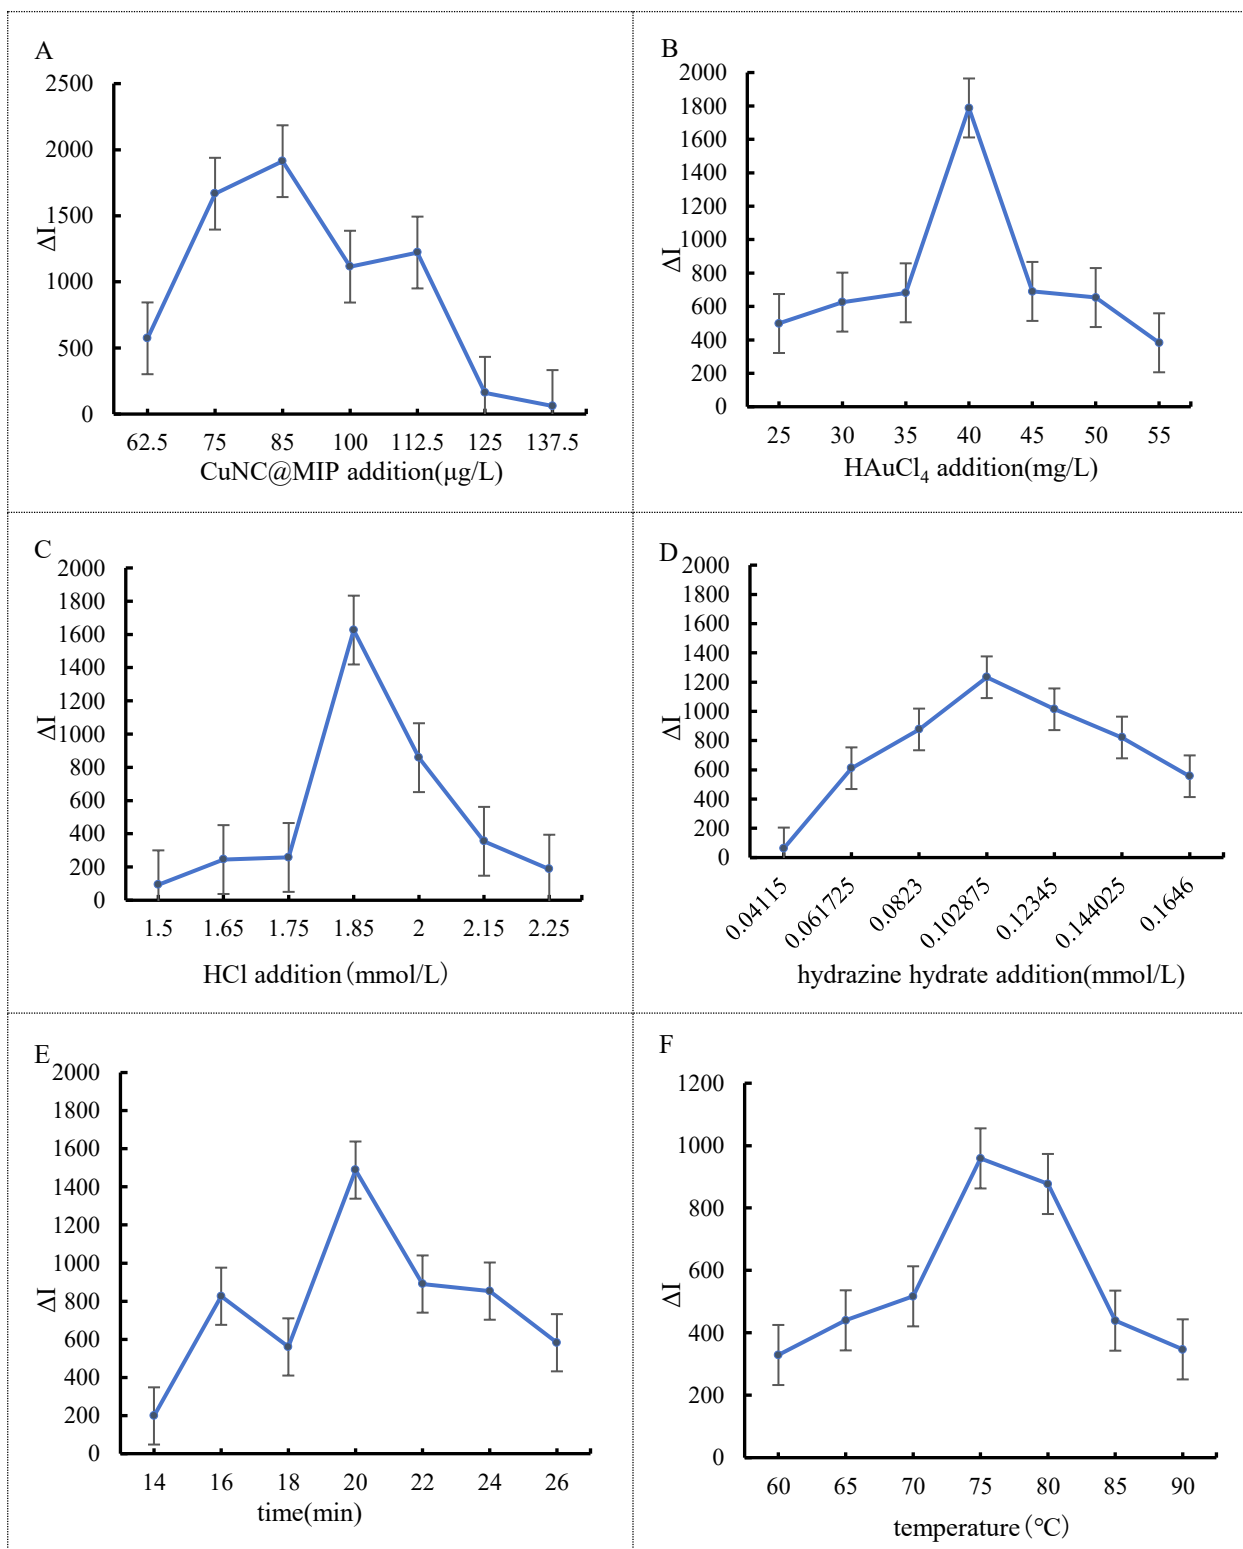

Fig. S11 RRS condition optimization for the CuNC@MIP-HAuCl<sub>4</sub>-HCl-hydrazine hydrate assay system

A: effect of CuNC@MIP additions: CuNC@MIP(62.5,75,85,100,112.5,125,137.5) μg/L -0.0165 nmol/L TCP-40 mg/L HAuCl<sub>4</sub>-1.85 mmol/L HCl-0.10 mmol/L hydrazine hydrate, 75 °C water

bath 20 min, B: effect of H<sub>AuCl<sub>4</sub></sub> additions: 85 μg/L CuNC@MIP-0.0165 nmol/L TCP-(25,30,35,40,45,50,55) mg/L H<sub>AuCl<sub>4</sub></sub>-1.85 mmol/L HCl-0.10 mmol/L hydrazine hydrate, 75 °C water bath 20 min, C: effect of HCl additions: 85 μg/L CuNC@MIP-0.0165 nmol/L TCP-40 mg/L H<sub>AuCl<sub>4</sub></sub>-(1.5,1.65,1.75,1.85,2,2.15,2.25) mmol/L HCl-0.10 mmol/L hydrazine hydrate, 75 °C water bath 20 min, D: effect of hydrazine hydrate additions: 85 μg/L CuNC@MIP-0.0165 nmol/L TCP-40 mg/L H<sub>AuCl<sub>4</sub></sub>-1.85 mmol/L HCl-(0.041,0.062,0.082,0.10,0.12,0.144,0.16) mmol/L hydrazine hydrate, 75 °C water bath 20 min, E: effect of time : 85 μg/L CuNC@MIP-0.0165 nmol/L TCP-40 mg/L H<sub>AuCl<sub>4</sub></sub>-1.85 mmol/L HCl-0.10 mmol/L hydrazine hydrate, 75 °C water bath (14,16,18,20,22,24,26) min, F: effect of temperature: 85 μg/L CuNC@MIP-0.0165 nmol/L TCP-40 mg/L H<sub>AuCl<sub>4</sub></sub>-1.85 mmol/L HCl-0.10 mmol/L hydrazine hydrate, (60,65,70,75,80,85,90) °C water bath 20 min.

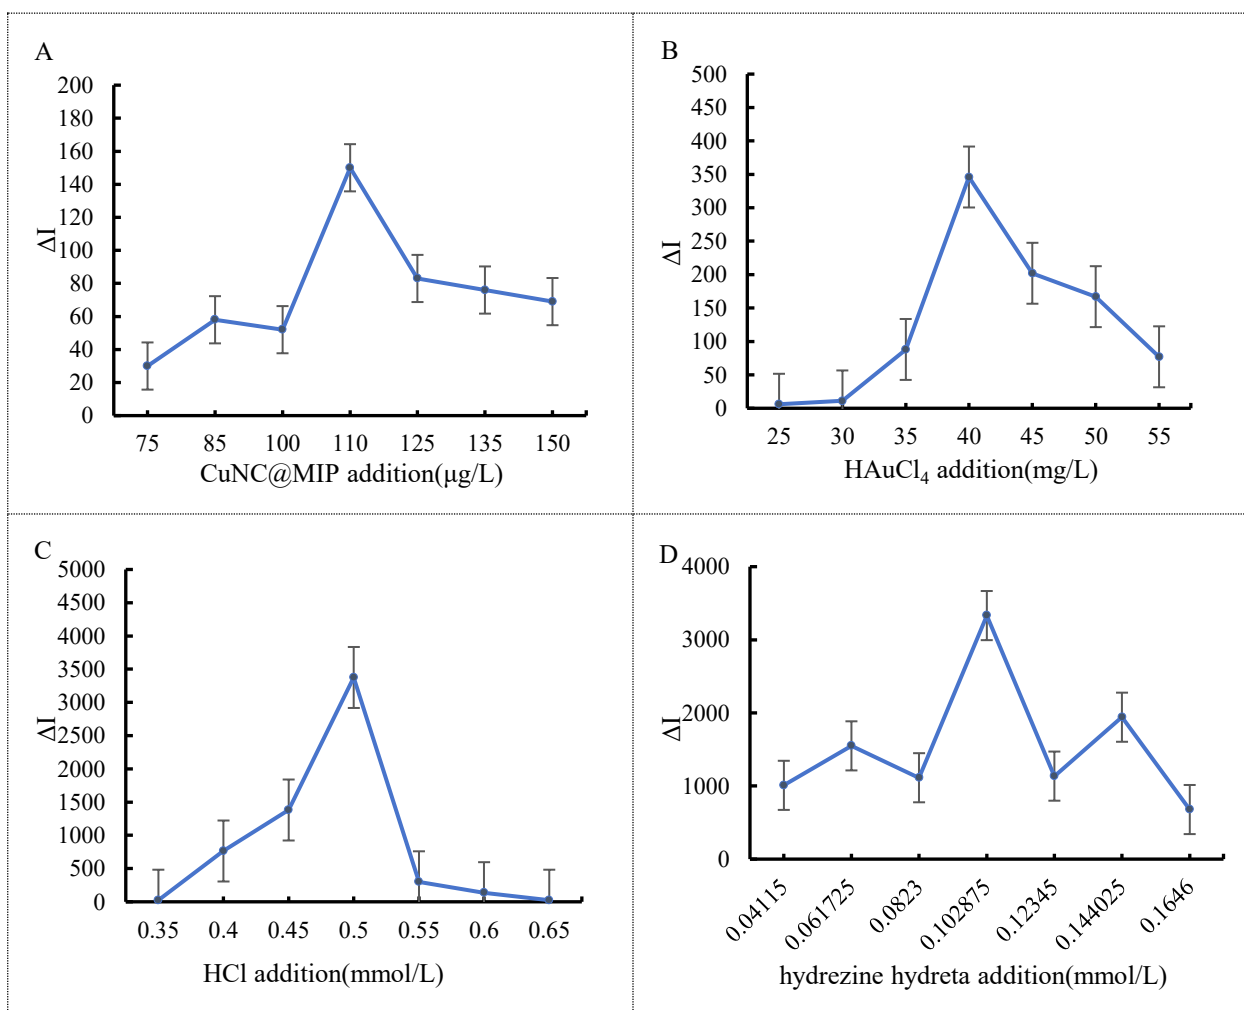

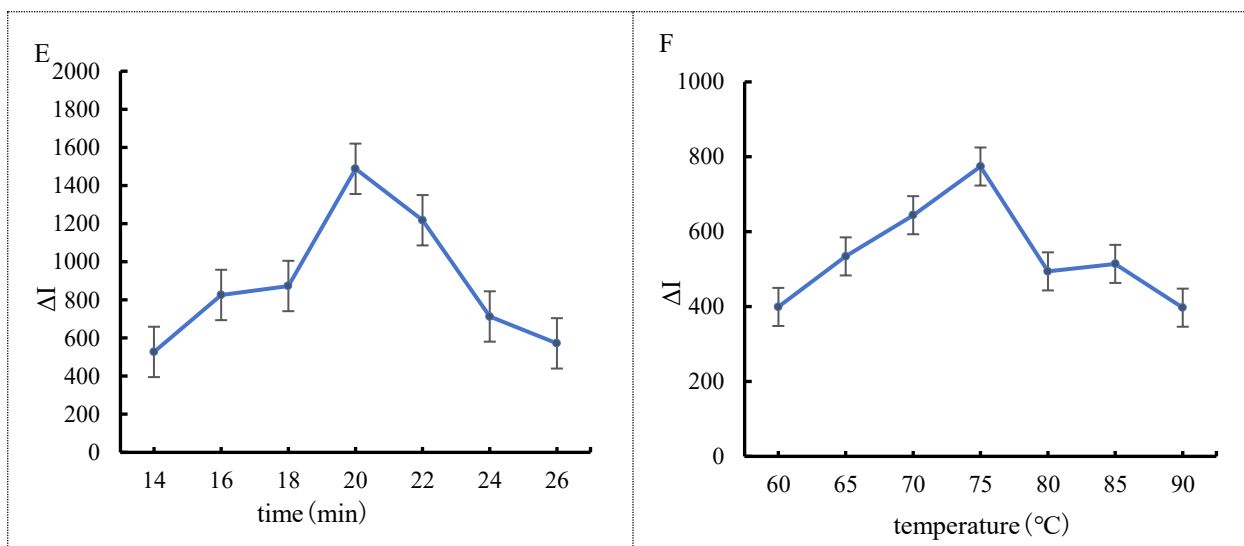

Fig. S12 CuNC @ MIPHAuCl<sub>4</sub>-HCl-hydrazine hydrate analytical system

A: effect of CuNC@MIP additions: CuNC@MIP(75,85,100,110,125,135,150)  $\mu\text{g/L}$  -0.0165 nmol/L TCP-40 mg/L HAuCl<sub>4</sub>-1.85 mmol/L HCl-0.10 mmol/L hydrazine hydrate, 75 °C water bath 20 min, B: effect of HAuCl<sub>4</sub> additions: 85  $\mu\text{g/L}$  CuNC@MIP-0.0165 nmol/L TCP-(25,30,35,40,45,50,55) mg/L HAuCl<sub>4</sub>-1.85 mmol/L HCl-0.10 mmol/L hydrazine hydrate, 75 °C water bath 20 min, C: effect of HCl additions: 85  $\mu\text{g/L}$  CuNC@MIP-0.0165 nmol/L TCP-40 mg/L HAuCl<sub>4</sub>-(0.35,0.4,0.45,0.5,0.55,0.6,0.65) mmol/L HCl-0.10 mmol/L hydrazine hydrate, 75 °C water bath 20 min, D: effect of hydrazine hydrate additions: 85  $\mu\text{g/L}$  CuNC@MIP-0.0165 nmol/L TCP-40 mg/L HAuCl<sub>4</sub>-1.85 mmol/L HCl-(0.041,0.062,0.082,0.10,0.12,0.144,0.16) mmol/L hydrazine hydrate, 75 °C water bath 20 min, E: effect of time : 85  $\mu\text{g/L}$  CuNC@MIP-0.0165 nmol/L TCP-40 mg/L HAuCl<sub>4</sub>-1.85 mmol/L HCl-0.10 mmol/L hydrazine hydrate, 75 °C water bath (14,16,18,20,22,24,26) min, F: effect of temperature: 85  $\mu\text{g/L}$  CuNC@MIP-0.0165 nmol/L TCP-40 mg/L HAuCl<sub>4</sub>-1.85 mmol/L HCl-0.10 mmol/L hydrazine hydrate, (60,65,70,75,80,85,90) °C water bath 20 min.

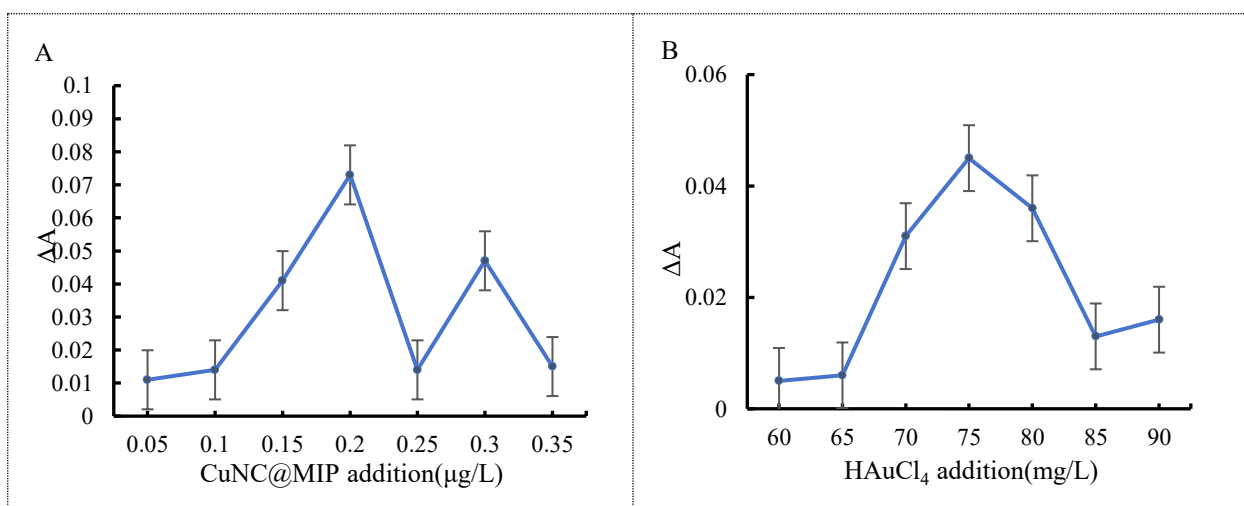

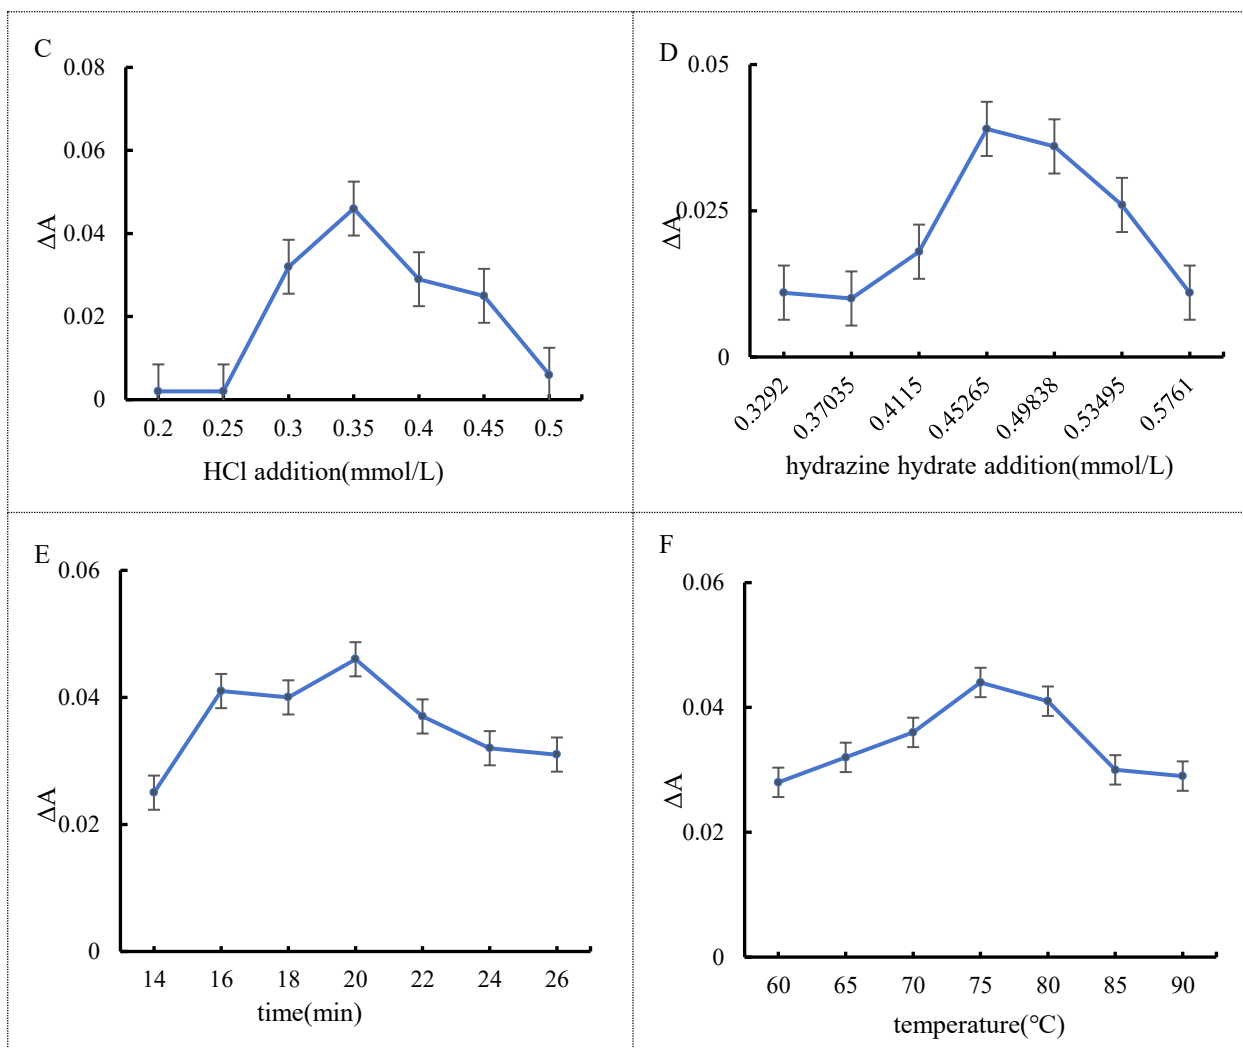

Fig S13. CuNC@MIP-HAuCl<sub>4</sub>-HCl-hydrazine hydrate analysis system Abs condition optimization  
 A: effect of CuNC@MIP additions: CuNC@MIP(0.05,0.1,0.15,0.2,0.25,0.3,0.35) mg/L -0.0165 nmol/L TCP-40 mg/L HAuCl<sub>4</sub>-1.85 mmol/L HCl-0.10 mmol/L hydrazine hydrate, 75  $^{\circ}\text{C}$  water bath 20 min, B: effect of HAuCl<sub>4</sub> additions: 85  $\mu\text{g/L}$  CuNC@MIP-0.0165 nmol/L TCP-(60,65,70,75,80,85,90) mg/L HAuCl<sub>4</sub>-1.85 mmol/L HCl-0.10 mmol/L hydrazine hydrate, 75  $^{\circ}\text{C}$  water bath 20 min, C: effect of HCl additions: 85  $\mu\text{g/L}$  CuNC@MIP-0.0165 nmol/L TCP-40 mg/L HAuCl<sub>4</sub>-(0.2,0.25,0.3,0.35,0.4,0.45,0.5) mmol/L HCl-0.10 mmol/L hydrazine hydrate, 75  $^{\circ}\text{C}$  water bath 20 min, D: effect of hydrazine hydrate additions: 85  $\mu\text{g/L}$  CuNC@MIP-0.0165 nmol/L TCP-40 mg/L HAuCl<sub>4</sub>-1.85 mmol/L HCl-(0.33,0.37,0.41,0.45,0.49,0.53,0.58) mmol/L hydrazine hydrate, 75  $^{\circ}\text{C}$  water bath 20 min, E: effect of time : 85  $\mu\text{g/L}$  CuNC@MIP-0.0165 nmol/L TCP-40 mg/L HAuCl<sub>4</sub>-1.85 mmol/L HCl-0.10 mmol/L hydrazine hydrate, 75  $^{\circ}\text{C}$  water bath (14,16,18,20,22,24,26) min, F: effect of temperature: 85  $\mu\text{g/L}$  CuNC@MIP-0.0165 nmol/L TCP-40 mg/L HAuCl<sub>4</sub>-1.85 mmol/L HCl-0.10 mmol/L hydrazine hydrate,(60,65,70,75,80,85,90)  $^{\circ}\text{C}$  water bath 20 min.

Table S1. CuNC@MIP-HAuCl<sub>4</sub>-HCl-hydrazine hydrate/diphenylcarbazone/hydroxylamine hydrochloride/sym-diphenylcarbazide/hydrazine sulfate

| reducing agent | linearity range (mg/L) | linear equation | correlation coefficient ( $R^2$ ) |
|----------------|------------------------|-----------------|-----------------------------------|
|----------------|------------------------|-----------------|-----------------------------------|

|                             |            |                                            |        |
|-----------------------------|------------|--------------------------------------------|--------|
| hydrazine hydrate           | 0.01-0.1   | $\Delta I_{370\text{nm}} = 9690C - 23.2$   | 0.9906 |
| diphenylcarbazon            | 0.025-0.15 | $\Delta I_{370\text{nm}} = 1167C + 3.2$    | 0.9812 |
| hydroxylamine hydrochloride | 0.025-0.15 | $\Delta I_{370\text{nm}} = 3132C - 19.6$   | 0.9700 |
| sym-diphenylcarbazine       | 0.01-0.15  | $\Delta I_{370\text{nm}} = 6994.3C + 8.5$  | 0.9712 |
| hydrazine sulfate           | 0.01-0.15  | $\Delta I_{370\text{nm}} = 7787.9C + 11.3$ | 0.9903 |

Table S2. Comparison of the catalytic properties of the nanomaterials

| material                | linearity range<br>(mg/L)                      | linear equation                                                            | correlation<br>coefficient<br>( $R^2$ ) |
|-------------------------|------------------------------------------------|----------------------------------------------------------------------------|-----------------------------------------|
| AuNC@MIP                | 0.025-0.25                                     | $\Delta I_{370\text{nm}} = 3.69 \times 10^3 C_{\text{AuNC@MIP}} - 11.3$    | 0.9876                                  |
| AuNC@MIP                | $5 \times 10^{-7}$ - $4.5 \times 10^{-5}$      | $\Delta I_{370\text{nm}} = 2.17 \times 10^7 C_{\text{AuNC}} - 11.3$        | 0.9900                                  |
| AgNC@MIP                | 0.01-0.2                                       | $\Delta I_{370\text{nm}} = 6.08 \times 10^3 C_{\text{AgNC@MIP}} - 2.9$     | 0.9818                                  |
| AgNC@MIP                | $8.19 \times 10^{-6}$ - $1.638 \times 10^{-4}$ | $\Delta I_{370\text{nm}} = 7.42 \times 10^6 C_{\text{AgNC}} - 2.9$         | 0.9800                                  |
| CuNC@MIP                | 0.01-0.1                                       | $\Delta I_{370\text{nm}} = 9.69 \times 10^3 C_{\text{CuNC@MIP}} - 23.2$    | 0.9906                                  |
| CuNC@MIP                | $1.23 \times 10^{-5}$ - $1.23 \times 10^{-4}$  | $\Delta I_{370\text{nm}} = 7.87 \times 10^6 C_{\text{CuNC}} - 23.2$        | 0.9900                                  |
| CuNC@NIP                | 0.1-1                                          | $\Delta I_{370\text{nm}} = 3.61 \times 10^2 C_{\text{CuNC@NIP}} - 8.4$     | 0.9859                                  |
| CuNC@NIP                | $1.23 \times 10^{-4}$ - $1.23 \times 10^{-3}$  | $\Delta I_{370\text{nm}} = 2.00 \times 10^5 C_{\text{CuNC}} - 8.4$         | 0.9859                                  |
| CuNC@MIP <sub>TCP</sub> | 0.01-0.075                                     | $\Delta I_{370\text{nm}} = 1.00 \times 10^4 C_{\text{CuNC@MIPTCP}} + 23.8$ | 0.9867                                  |
| CuNC@MIP <sub>TCP</sub> | $1.47 \times 10^{-5}$ - $1.305 \times 10^{-4}$ | $\Delta I_{370\text{nm}} = 6.00 \times 10^6 C_{\text{CuNC@MIPTCP}} + 23.8$ | 0.9900                                  |
| MIP                     | 0.2-1.75                                       | $\Delta I_{370\text{nm}} = 378.86 C_{\text{MIP}} - 1.8$                    | 0.9916                                  |
| AuNC                    | 0.01-0.075                                     | $\Delta I_{370\text{nm}} = 1006.9 C_{\text{AuNC}} + 27.3$                  | 0.9727                                  |
| AgNC                    | 0.01-0.08                                      | $\Delta I_{370\text{nm}} = 1008 C_{\text{AgNC}} - 6.6$                     | 0.9833                                  |
| CuNC                    | 0.042-0.026                                    | $\Delta I_{370\text{nm}} = 1300.8 C_{\text{CuNC}} - 46.7$                  | 0.9937                                  |

Table S3. Comparison of the reported assays for the determination of TCP

| Method                  | Method principle                                                                                                                                                                                                                                                   | Linearity range<br>(nmol/L) | LOD<br>(nmol/L) | Annotation                                      | reference |
|-------------------------|--------------------------------------------------------------------------------------------------------------------------------------------------------------------------------------------------------------------------------------------------------------------|-----------------------------|-----------------|-------------------------------------------------|-----------|
| Electrochemical process | A graphite carbon nitride nanosheet with Fe <sub>3</sub> O <sub>4</sub> nanorods (CN@Fe <sub>3</sub> O <sub>4</sub> ) composite modified screen-printed carbon electrode (SPCE) was prepared as a novel selective electrochemical sensor for the detection of TCP. | $4 \times 10^{-5}$ -0.651   | 12              | High selectivity and complex sensor preparation | [42]      |



|                 |                                                                                                                                                                                                                                                                                                                                                                              |                                      |      |                                                                  |      |
|-----------------|------------------------------------------------------------------------------------------------------------------------------------------------------------------------------------------------------------------------------------------------------------------------------------------------------------------------------------------------------------------------------|--------------------------------------|------|------------------------------------------------------------------|------|
| phosphorescence | <p>A magnetic molecularly imprinted phosphorescent nanoparticle probe doped with quantum dots (QDs) using TCP as a template molecule and Fe<sub>3</sub>O<sub>4</sub> as a core was prepared. Due to the presence of QDs, good magnetic properties and high selectivity for TCP, the resulting nanoprobe shows intense phosphorescence.</p>                                   | 1×10 <sup>2</sup> -3×10 <sup>4</sup> | 35   | Highly selective, complex probe preparation                      | [43] |
| Fluorescence    | <p>An ideal fluorescent MIP sensor SiO<sub>2</sub>@dye-MIP with TCP as a template, 7-allyloxy coumarin as a fluorescent functional monomer, and 3-(methacryloyloxy)propyl trimethoxysilane (MPS)-modified SiO<sub>2</sub> spheres as a solid carrier has been designed, which selectively detects TCP by solid-state fluorescence detection without dispersive solution.</p> | 1-1000                               | 0.53 | Simple operation and wide linear range                           | [44] |
| HPLC-UV         | <p>Covalent triazine skeletons (CTFs) were introduced into stir bar sorptive extraction (SBSE) and polydimethylsiloxane (PDMS)/ CTFs stir bar coatings were prepared by sol-gel technique for the adsorption of TCP followed by high performance liquid chromatography-ultraviolet (HPLC-UV) detection.</p>                                                                  | 5-2538                               | 1.47 | Wide linear range, high extraction efficiency, complex operation | [47] |

|                                     |                                                                                                                                                                                      |                                                                     |                          |                                                     |           |
|-------------------------------------|--------------------------------------------------------------------------------------------------------------------------------------------------------------------------------------|---------------------------------------------------------------------|--------------------------|-----------------------------------------------------|-----------|
| Gas chromatography                  | Simultaneous dispersive liquid-liquid microextraction and derivatization methods based on low-density solvents for the simultaneous determination of chloroanisole and TCP in water. | 0.0508-50.8                                                         | 0.015                    | Efficient and simple, low sensitivity               | [48]      |
| Microorganisms - Gas Chromatography | Quantitative conversion of TCP to 2,4,6-trichloroanisole (TCA) using microorganisms, followed by detection and analysis of TCA by gas chromatography                                 | 0.508-50.8                                                          | 0.026                    | High selectivity and complex operation              | [49]      |
| RRS/SERS/Abs                        | Based on the catalytic amplification and recognition function of CuNC@MIP, AuNP was used as an indicator to determine TCP.                                                           | 0.01-0.1<br>$7.5 \times 10^{-3}$ - $7.5 \times 10^{-2}$<br>0.01-0.1 | 0.021<br>0.0010<br>0.042 | High sensitivity, good selectivity, easy to operate | This work |

Table S4. Effect of coexisting substances on the determination of TCP by RRS

| Coexisting substances | Factor | Fractional error (%) | Coexisting substances         | Factor | Fractional error (%) |
|-----------------------|--------|----------------------|-------------------------------|--------|----------------------|
| Phenol                | 100    | -5.45                | K <sup>+</sup>                | 1000   | 1.73                 |
| 4-Chlorophenol        | 100    | -2.48                | Al <sup>3+</sup>              | 1000   | -3.00                |
| Bisphenol A           | 400    | -2.21                | Hg <sup>2+</sup>              | 1000   | -1.13                |
| catechol              | 400    | 2.21                 | Mn <sup>2+</sup>              | 1000   | 1.15                 |
| atrazine              | 400    | 2.85                 | I <sup>-</sup>                | 1000   | 2.52                 |
| Cu <sup>2+</sup>      | 1000   | 6.12                 | Mg <sup>2+</sup>              | 1000   | -6.89                |
| NH <sup>4+</sup>      | 1000   | -8.19                | SO <sub>3</sub> <sup>2-</sup> | 1000   | -3.12                |
| Ca <sup>2+</sup>      | 1000   | -0.74                | CO <sub>3</sub> <sup>2-</sup> | 1000   | -5.61                |
| Na <sup>+</sup>       | 1000   | -3.1                 | Cr <sup>3+</sup>              | 1000   | 1.10                 |
| Fe <sup>3+</sup>      | 1000   | -9.4                 | F <sup>-</sup>                | 1000   | 1.66                 |

NO<sub>3</sub><sup>-</sup>                      1000                      3.10                      Cd<sup>2+</sup>                      1000                      1.94

Table S5. Measurement of TCP in water samples

| Sample                | Average<br>(nmol/L) | Added<br>(nmol/L) | Found<br>(nmol/L) | Recovery<br>(%) | RSD<br>(%) | Content<br>(nmol/L) |
|-----------------------|---------------------|-------------------|-------------------|-----------------|------------|---------------------|
| Domestic wastewater 1 | 0.027               |                   | 0.032             | 97.223          | 1.115      | 0.0534              |
| Domestic wastewater 2 | 0.027               |                   | 0.032             | 108.561         | 1.700      | 0.0537              |
| Domestic wastewater 3 | 0.027               |                   | 0.033             | 102.892         | 1.438      | 0.0548              |
| Tap water 1           | 0.022               |                   | 0.027             | 97.873          | 0.566      | 0.0447              |
| Tap water 2           | 0.021               |                   | 0.025             | 94.611          | 2.522      | 0.0415              |
| Tap water 3           | 0.021               | 0.005             | 0.026             | 101.936         | 0.587      | 0.0427              |
| Rainwater 1           | 0.023               |                   | 0.028             | 97.987          | 0.946      | 0.0463              |
| Rainwater 2           | 0.024               |                   | 0.029             | 107.287         | 0.770      | 0.0480              |
| Rainwater 3           | 0.023               |                   | 0.028             | 100.854         | 0.505      | 0.0451              |
| Lake water 1          | 0.025               |                   | 0.030             | 98.497          | 1.431      | 0.0501              |
| Lake water 2          | 0.023               |                   | 0.028             | 97.860          | 0.468      | 0.0457              |
| Lake water 3          | 0.021               |                   | 0.026             | 98.751          | 1.001      | 0.0417              |
